# Supplementary material
Source: publisher site journal article supplement (https://www.dovepress.com/article/450203)
Supplement: Supplementary file 1 [file get_supplementary_file.php]

# Introduction of unit-dose care in the 1,125 bed teaching hospital: Practical experience and time saving on wards

## Supplementary file

### Supplementary Figure 1 Rollout of UDDS and prescription software in the clinic group.

The rollout began in December 2020 with the connection of a pilot ward at the maximum care hospital in Erfurt (HK-EF). This was followed in 2021 by the connection of further wards in the maximum care provider and the introduction of the prescription software in the basic/regular care provider Gotha (HK-GTH). In 2022, it was possible to introduce the UDDS in May, first in the orthopaedic special clinic Bleicherode (HK-BLE) at the same time as the electronic prescription, followed in June by the introduction of UDDS in the basic/regular care provider Gotha and finally in November by the parallel introduction of unit-dose and the prescription software in the basic/regular care provider Blankenhain (HK-BLA).

UDDS = unit dose dispensing system

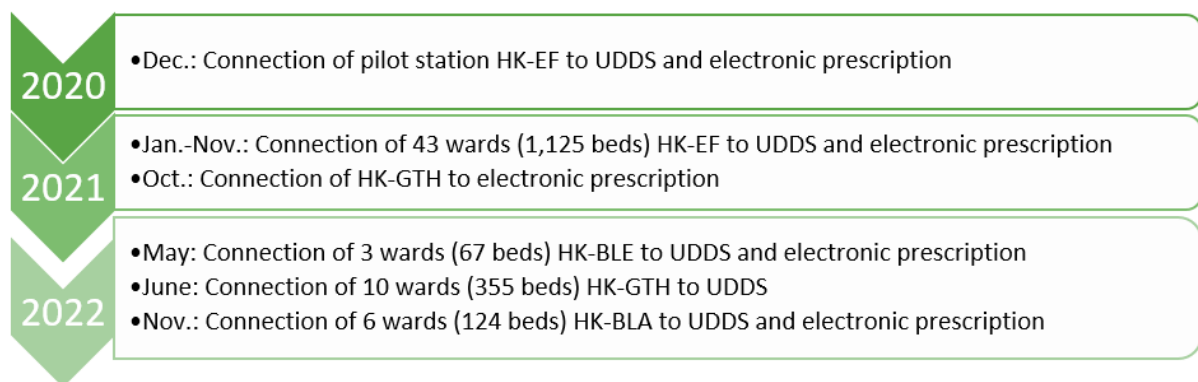

## Time required to dispense medication on the ward

## Survey form

The survey is anonymous and voluntary. Please do not enter any names!

Contact details for questions:  
 Jana Giesel-Gertmeier@helios-geundheit.de  
 sandra.duepmeier@uk-koeln.de  
 rebekka.lemsen@uk-koeln.de

Ward: \_\_\_\_\_

Date: \_\_\_\_\_

Number of patients on the ward at night: \_\_\_\_\_

| Please enter each employee once per shift | Current number of patients on the ward | Which shift are you currently working? Please tick the appropriate box | Ordering drugs                                                                                                                                                       |                                                                                                                              | Sorting drugs into ward stock     |                                                                                                                                                                                     | Dispensing oral drugs                                                                                                                                                                             |                                                      | Control of dispensed drugs |                         | Others around drugs     |                         |
|-------------------------------------------|----------------------------------------|------------------------------------------------------------------------|----------------------------------------------------------------------------------------------------------------------------------------------------------------------|------------------------------------------------------------------------------------------------------------------------------|-----------------------------------|-------------------------------------------------------------------------------------------------------------------------------------------------------------------------------------|---------------------------------------------------------------------------------------------------------------------------------------------------------------------------------------------------|------------------------------------------------------|----------------------------|-------------------------|-------------------------|-------------------------|
|                                           |                                        |                                                                        | For example<br>- Stock control of medicines on the ward<br>- Reordering used medicines<br>- Ordering missing medicines<br>- Ordering of medicines used in the future | For example<br>- Acceptance of the delivery<br>- Checking the delivery (comparison with order)<br>- Sorting into the cabinet | Capsules, tablets, coated tablets | For example<br>- Gathering the required medicines<br>- Fetching missing medicines from other wards<br>- Looking up information (divisibility)<br>- Dispensing medicines in dosettes | For example<br>- Reconciliation of dispensed medications with prescribed medications<br>- Correction of dispensing errors<br>- Correction of medication changes since prescription and dispensing | Please name the activity and enter the minute value. |                            |                         |                         |                         |
| Employee x (example)                      | 10 patients (example)                  | Early shift<br>Evening shift<br>Night shift                            | 00:00 minutes (example)                                                                                                                                              | 00:00 minutes (example)                                                                                                      | 00:00 minutes (example)           | 00:00 minutes (example)                                                                                                                                                             | 00:00 minutes (example)                                                                                                                                                                           | 00:00 minutes (example)                              | 00:00 minutes (example)    | 00:00 minutes (example) | 00:00 minutes (example) | 00:00 minutes (example) |
| Employee 1                                |                                        |                                                                        |                                                                                                                                                                      |                                                                                                                              |                                   |                                                                                                                                                                                     |                                                                                                                                                                                                   |                                                      |                            |                         |                         |                         |
| Employee 2                                |                                        |                                                                        |                                                                                                                                                                      |                                                                                                                              |                                   |                                                                                                                                                                                     |                                                                                                                                                                                                   |                                                      |                            |                         |                         |                         |

### Supplementary Figure 3 Medication-related process steps on the ward.

In traditional care, the process begins with the dispensing of drugs by the nurse for the patient. The medication is checked by a second nurse according to the principle of dual control and then handed over or given to the patient. For the nursing staff, the process then continues with ordering the medication from the pharmacy and sorting the drugs delivered by the pharmacy into the ward stock. "Other around drugs" includes, among other things, the dispensing and administration of on-demand medication in all dosage forms, the handling of anaesthetics as well as processes regarding liquid and semi-solid medicines.

A direct influence of UDDS on individual sub-steps of the process can be assumed (fields highlighted in green).

UDDS = unit dose dispensing system

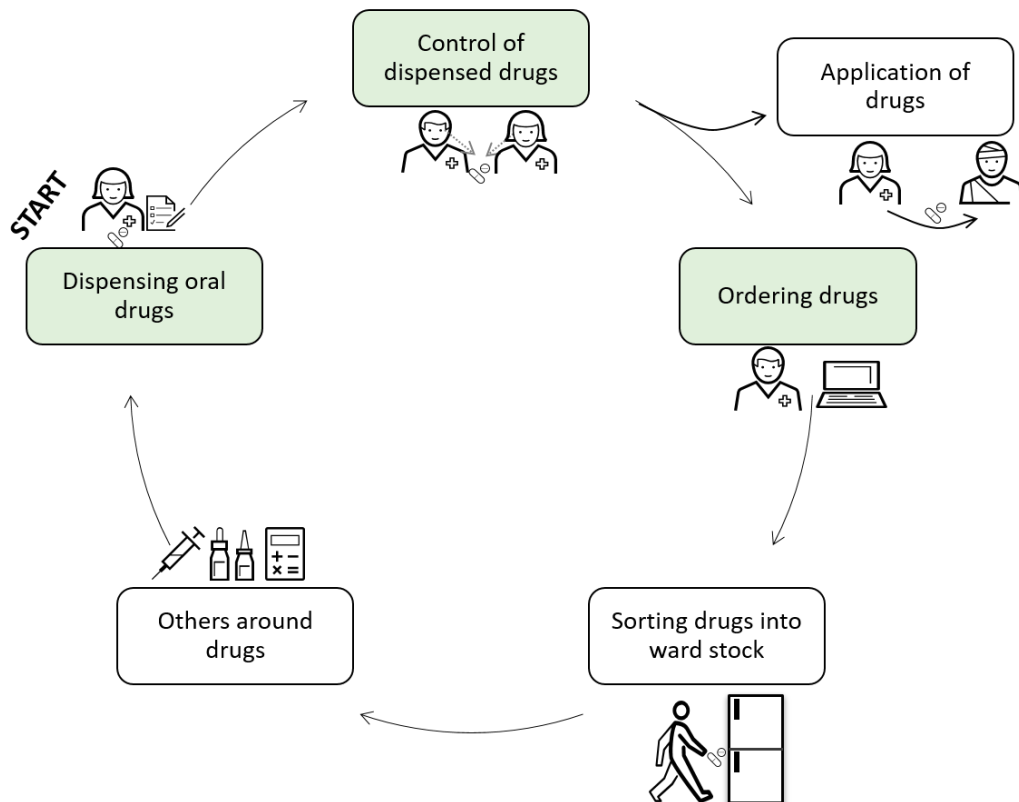

**Supplementary Table 1 Survey on satisfaction with the UDDS introduction and the respective response frequencies in absolute and relative numbers**

| Question                                                                                                                          | Number of responses | Agree whole-heartedly | Agree rather | Agree rather less | Do not agree at all | No answer |
|-----------------------------------------------------------------------------------------------------------------------------------|---------------------|-----------------------|--------------|-------------------|---------------------|-----------|
| Dispensing drugs on the ward is an essential activity of my job.                                                                  | 86                  | 50 (58%)              | 25 (29%)     | 10 (12%)          | 1 (1%)              | 0 (0%)    |
| Do you have any fears of a loss of competence if the dispensing of drugs is outsourced through UDDS?                              | 82                  | 8 (10%)               | 14 (17%)     | 29 (35%)          | 31 (38%)            | 0 (0%)    |
| UDDS represents a time relief for the nursing staff.                                                                              | 86                  | 7 (8%)                | 13 (15%)     | 31 (36%)          | 35 (41%)            | 0 (0%)    |
| The times of delivery of UDDS agreed with the pharmacy fit well into our processes.                                               | 84                  | 19 (23%)              | 32 (38%)     | 19 (23%)          | 14 (17%)            | 0 (0%)    |
| The amount of rework due to drug changes in the course of the ward's daily routine is quite reasonable and comprehensible for us. | 86                  | 9 (10%)               | 29 (34%)     | 31 (36%)          | 17 (20%)            | 0 (0%)    |
| The stock of solid dosage forms is reduced on the ward due to UDDS.                                                               | 85                  | 17 (20%)              | 43 (51%)     | 20 (24%)          | 5 (6%)              | 0 (0%)    |

UDDS = unit dose dispensing system

**Supplementary Table 2 Number of days filled in according to time of recording and number of wards surveyed**

|                               | HK-EF          |                |                |
|-------------------------------|----------------|----------------|----------------|
|                               | t <sub>0</sub> | t <sub>1</sub> | t <sub>2</sub> |
| Ordering drugs                | 70             | 39             | 54             |
| Sorting drugs into ward stock | 67             | 19             | 27             |
| Dispensing oral solid drugs   | 136            | 71             | 117            |
| Control of dispensed drugs    | 90             | 64             | 99             |
| Total time                    | 140            | 75             | 121            |
|                               | Wards supplied | Wards supplied | [%]            |
| Wards                         | 15             | 43             | 35             |

t<sub>0</sub> = before UDDS; t<sub>1</sub> = 4 weeks with UDDS; t<sub>2</sub> = from 6 months with UDDS; \* = time survey not carried out at this time.

HK-EF = teaching hospital Helios Klinikum Erfurt; UDDS = unit dose dispensing system
